# Supplementary material for: Self protein-protein interactions are involved in TPPP/p25 mediated microtubule bundling
Source: PubMed Central journal article supplement (PMC4542545; doi:10.1038/srep13242), 2015-08-20

**Self protein-protein interactions are involved in TPPP/p25  
mediated microtubule bundling**

Salvatore DeBonis<sup>3,1,2,§</sup>, Emmanuelle Neumann<sup>3,1,2§</sup>, Dimitrios A. Skoufias<sup>3,1,2\*</sup>

<sup>1</sup>Université de Grenoble Alpes, <sup>2</sup>CNRS, <sup>3</sup>CEA, IBS, F-38044 Grenoble, France

## Supplementary Figures Legends

**Figure S1 (a)** Folding predictions of human TPPP/p25 according to the FOLDINDEX software, which predicts whether a given protein sequence is intrinsically unfolded. The N- and C-terminal domains are estimated to have a high probability of being intrinsically unfolded (red) in contrast to the central core domain (green)<sup>33</sup>. **(b)** Charge distribution plot of TPPP/p25 showing that the N-terminus and C-terminus are positively charged. The core domain has alternating charges favoring a proposed “electrostatic zipper” of protein-protein interaction mode.

**Figure S2 (a)** Coomassie blue staining of full length TPPP/p25 and the supernatant after centrifugation following long term incubation (longer than 24h) with taxol stabilized MTs. **(b)** The proteolytic fragments were analyzed by N-terminal sequencing and the molecular masses were determined by MALDI mass spectrometry. **(c)** The corresponding N-terminal sequences are depicted in red in the amino acid sequence of full length TPPP/p25.

**Figure S3** MT binding properties of tag-free TPPP/p25. **(a)** Light scattering assays ( $OD_{350\text{ nm}}$ ) of tubulin solutions ( $15\ \mu\text{M}$ ) in the presence of His-tagged full length (FL) and tag cleaved full length ( $\text{FL}^{\text{HISFree}}$ ) and  $\text{core}^{\text{HISFree}}$  domain of TPPP/p25 (ratios of tubulin to TPPP/p25 are shown in parentheses). **(b)** EM images of microtubules assembled from tubulin solutions ( $15\ \mu\text{M}$ ) in the presence of FL and tag-cleaved FL and tag-cleaved core domain of TPPP/p25 (ratios of tubulin to TPPP/p25 are shown in parentheses). Scale bars in the left column of images correspond to  $0,5\ \mu\text{m}$ ; in the right column to  $0,2\ \mu\text{m}$ ). **(c)** Taxol stabilized microtubules ( $2\ \mu\text{M}$  tubulin) were incubated in the presence of  $12\ \mu\text{M}$  of either tag-cleaved FL or core domain of TPPP/p25 for 15 min

before centrifugation. Coomassie-stained gel of microtubule bound and unbound TPPP/p25 fragments present in the pellets and in the supernatants, respectively. **(d)** EM images of taxol stabilized microtubules incubated with bacterially expressed and purified tag-cleaved TPPP/p25 fragments (ratios of tubulin to TPPP/25 are shown in parentheses) Scale bars correspond to 0,2 $\mu$ m.

**Figure S4** Tag-cleaved TPPP/p25 competes with GFP-tagged TPPP/p25 for MT binding. Taxol stabilized MTs were first co-incubated with 2  $\mu$ M of tag-cleaved FL and 2  $\mu$ M GFP-FL-TPPP/p25 and then with increasing concentrations of tag-cleaved FL. Each data point represents the mean  $\pm$  SD from three independent experiments.

**Figure S5** Cells were transfected with either HA-full length **(a)**,  $\Delta$ C(158) **(b)**,  $\Delta$ N(49) **(c)** or core -TPPP/p25-VC173 **(d)**. Cells were then fixed and stained for indirect immunofluorescence microscopy using a monoclonal antibody recognizing the HA-tag. Perinuclear bundles are detected in cells transfected with the full length,  $\Delta$ N(49) and  $\Delta$ C(158) whereas a diffuse cytoplasmic staining is observed in cells expressing the core.

a

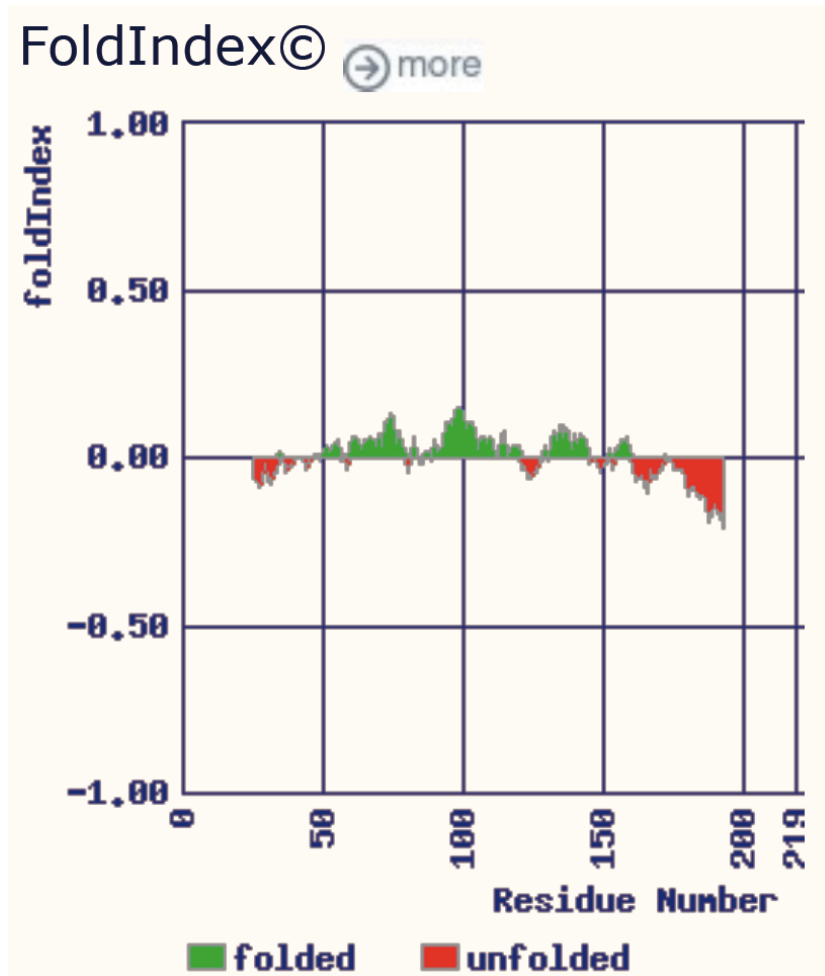

b

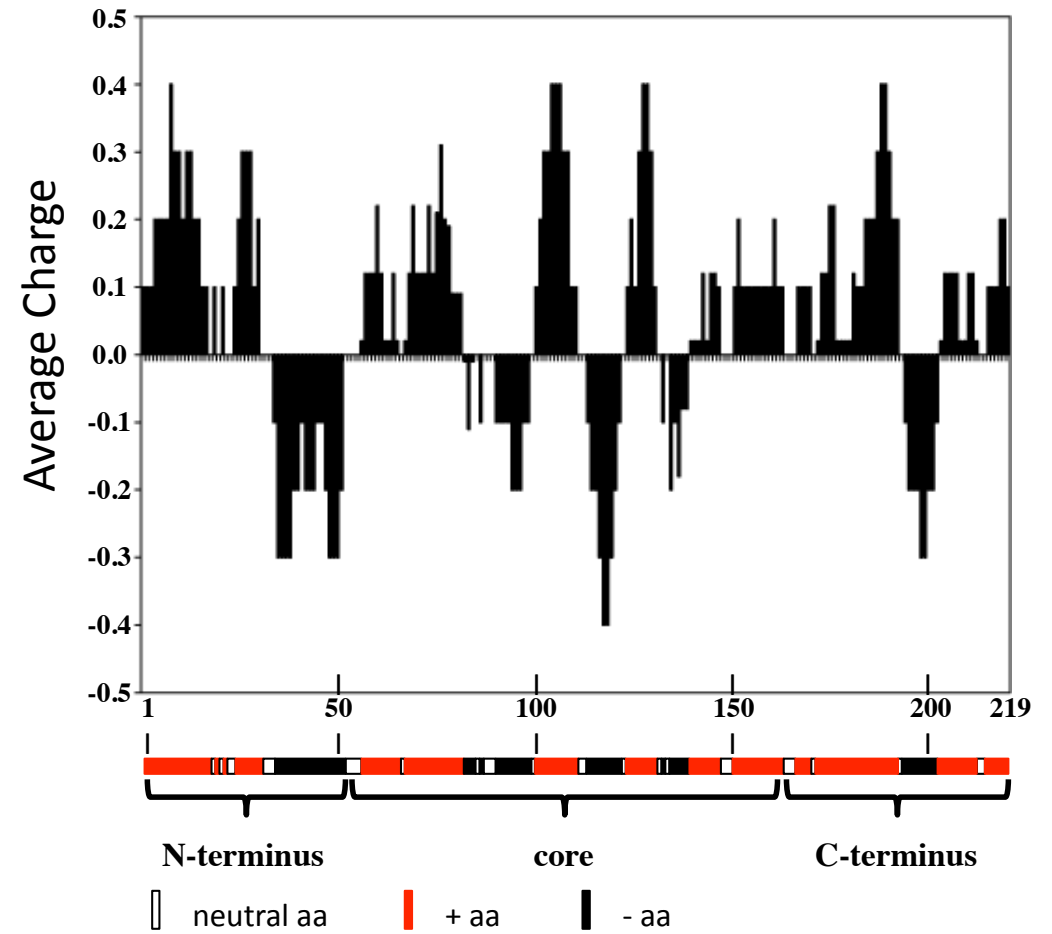





a

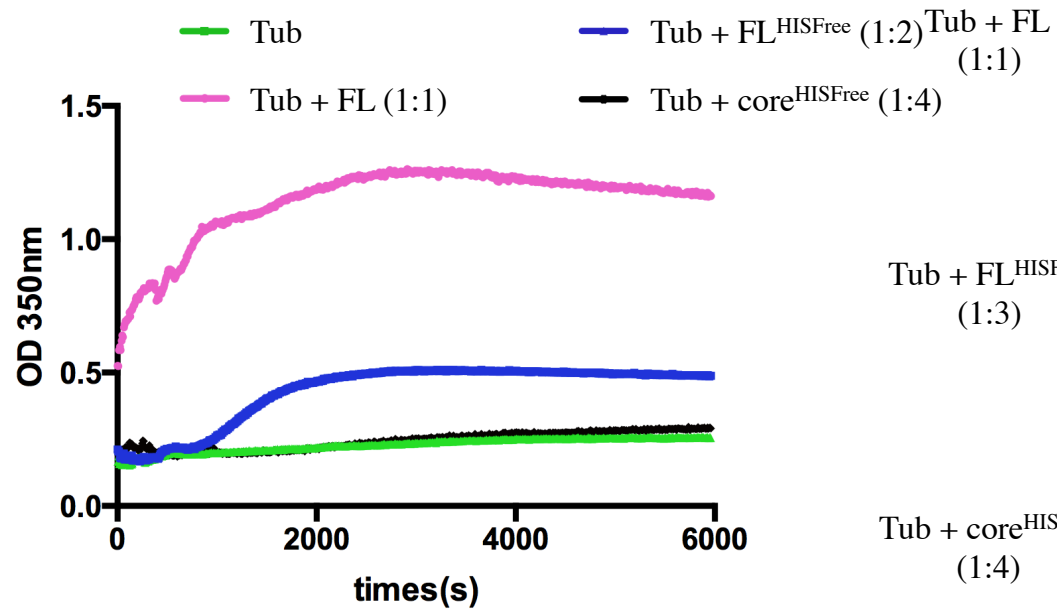

b

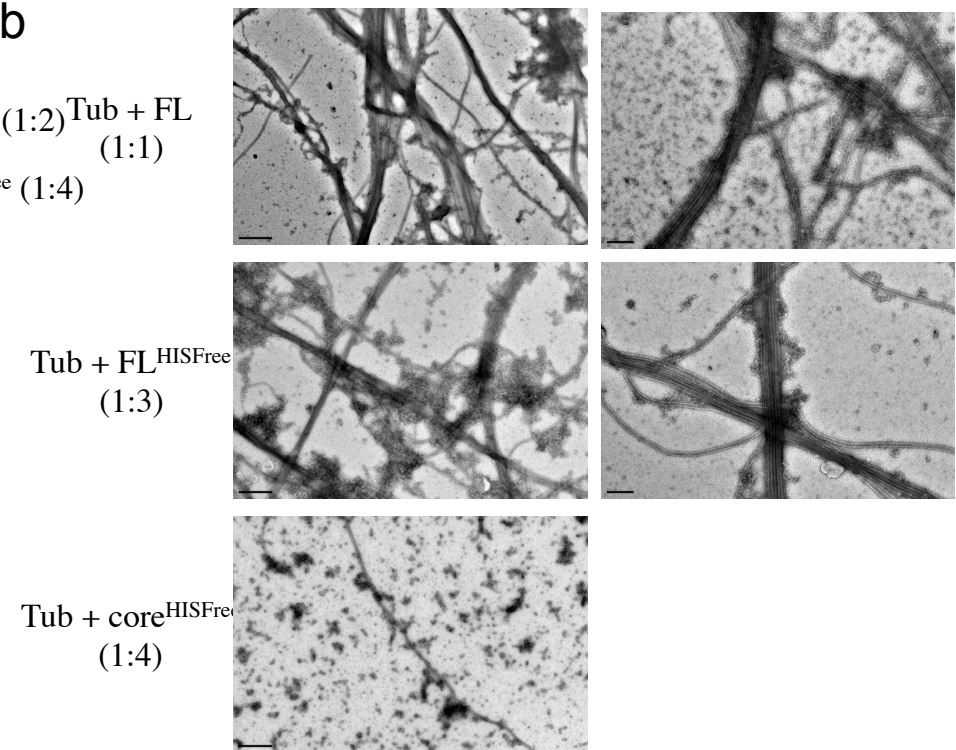

c

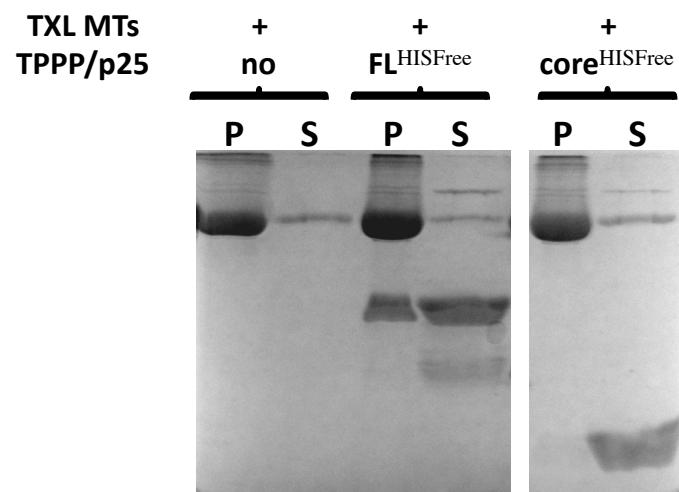

d

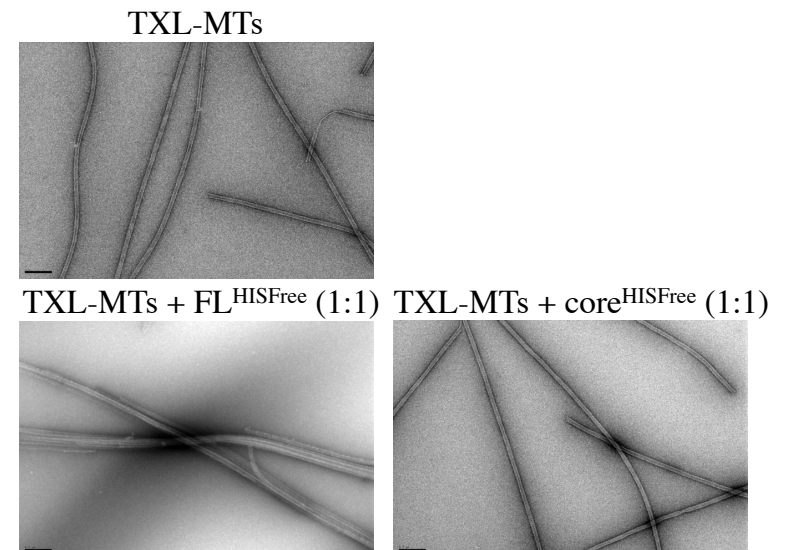

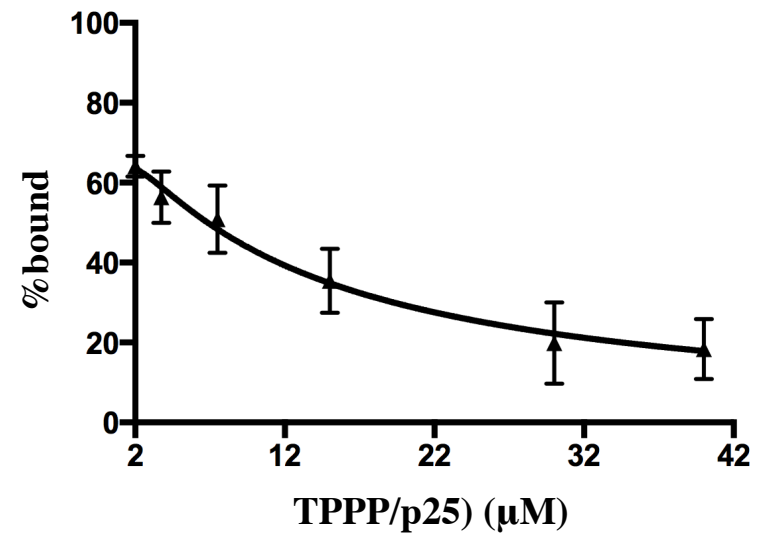

a

HA-TPPP-VC173

HA / DNA

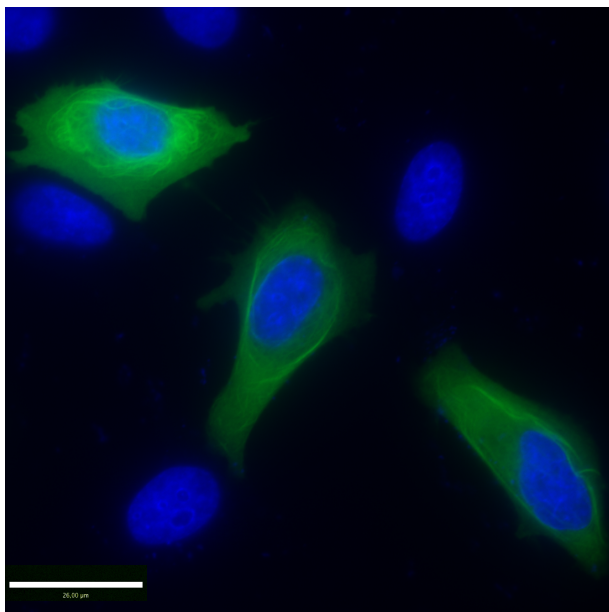

b

HA-( $\Delta$ C158)-TPPP-VC173

HA / DNA

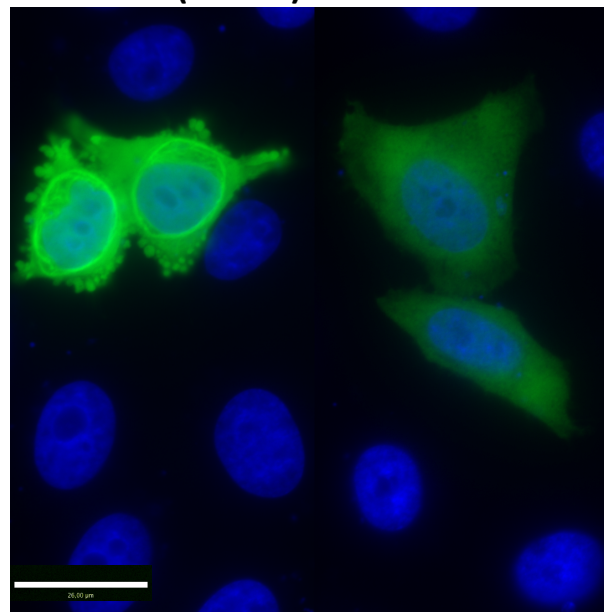

c

HA-( $\Delta$ N49)-TPPP-VC173

HA / DNA

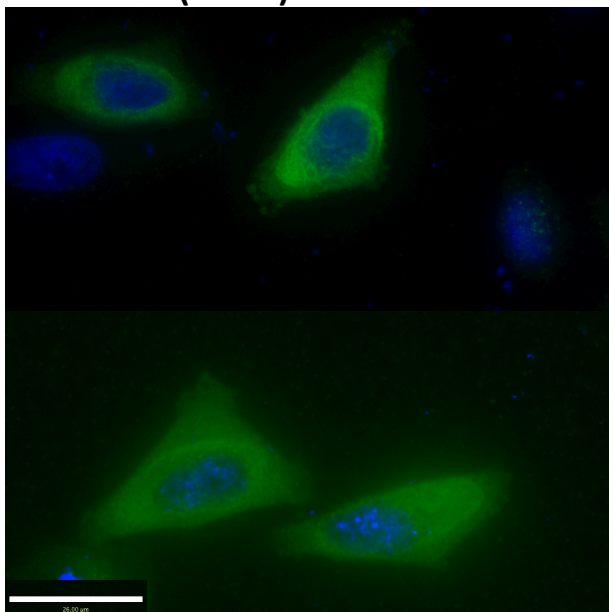

d

HA-( $\Delta$ N49- $\Delta$ C158)-TPPP-VC173

HA / DNA

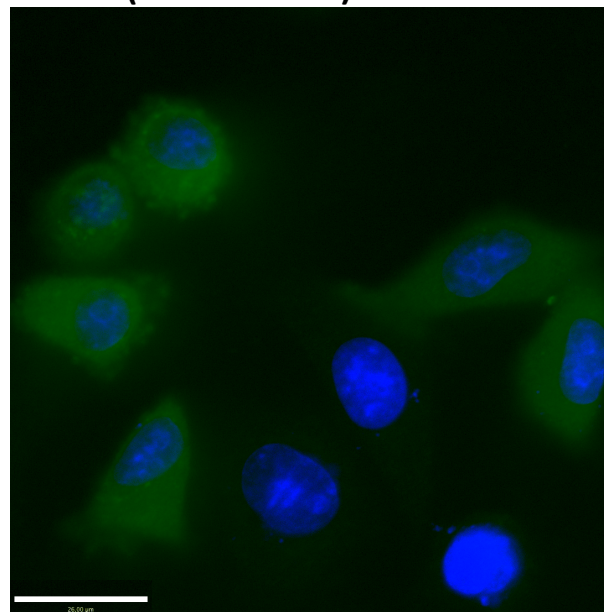

Supplement: srep13242-s1.pdf [file srep13242-s1.pdf]
